# Supplementary material for: A ΔclpB Mutant of Francisella tularensis Subspecies holarctica Strain, FSC200, Is a More Effective Live Vaccine than F. tularensis LVS in a Mouse Respiratory Challenge Model of Tularemia
Source: PubMed Central journal article supplement (PMC3827231; doi:10.1371/journal.pone.0078671), 2013-11-13
Supplement: pone.0078671.s001.pdf [file pone.0078671.s001.pdf]

Figure S1

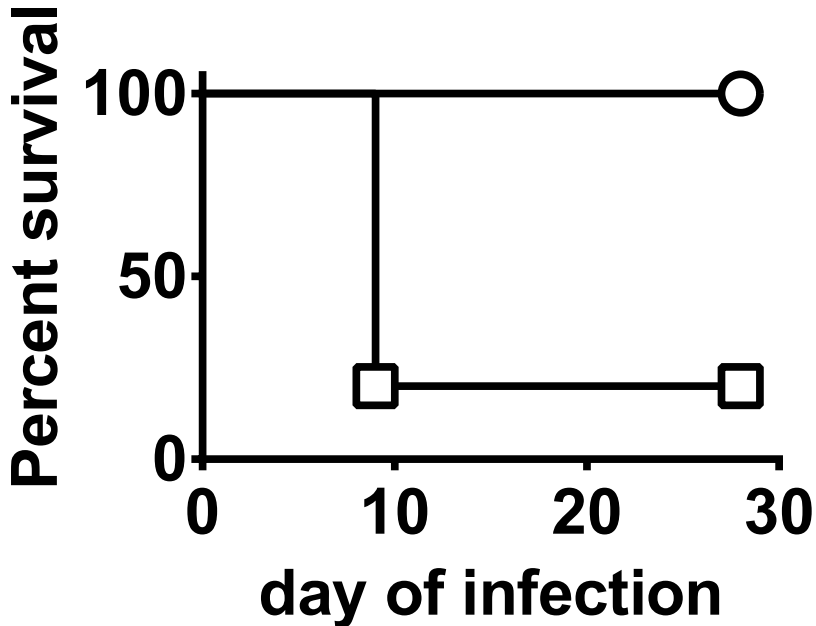

**Figure S2**

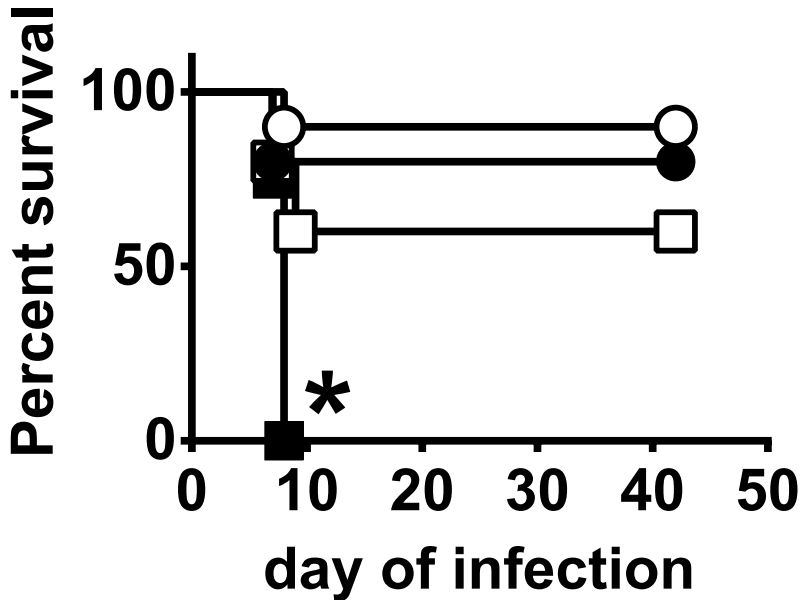

# Figure S3

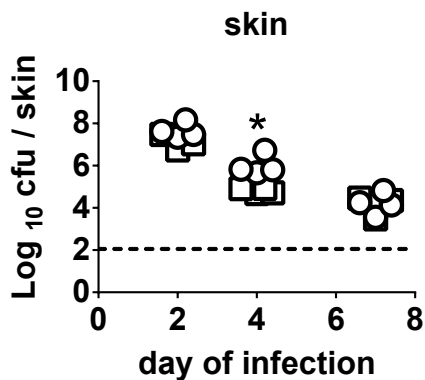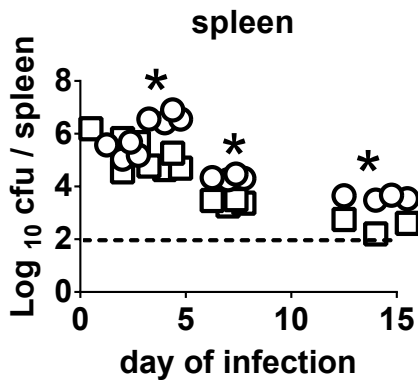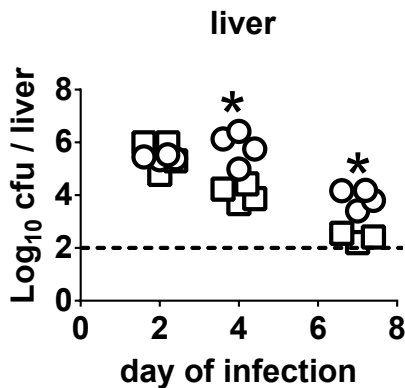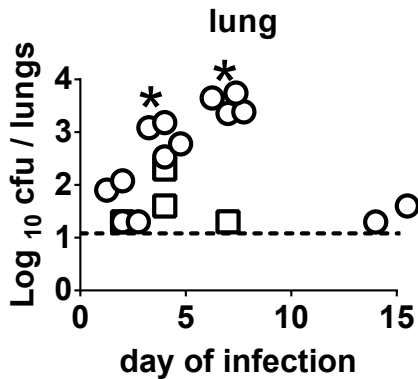

Figure S4

Francisella Skin Reaction Score Chart

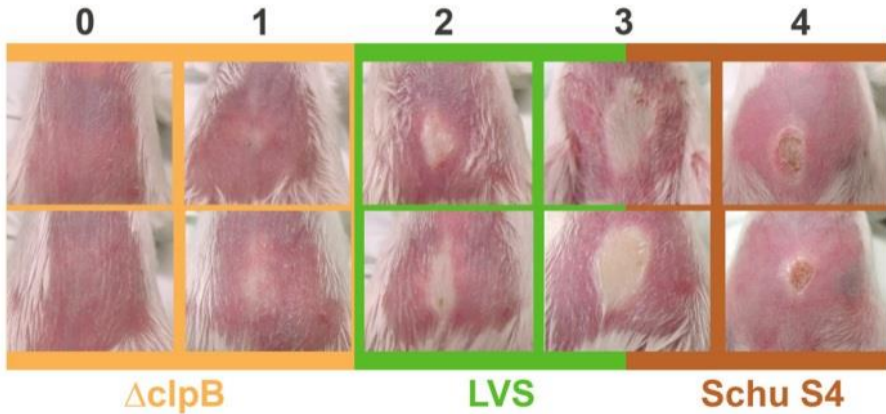

Figure S5

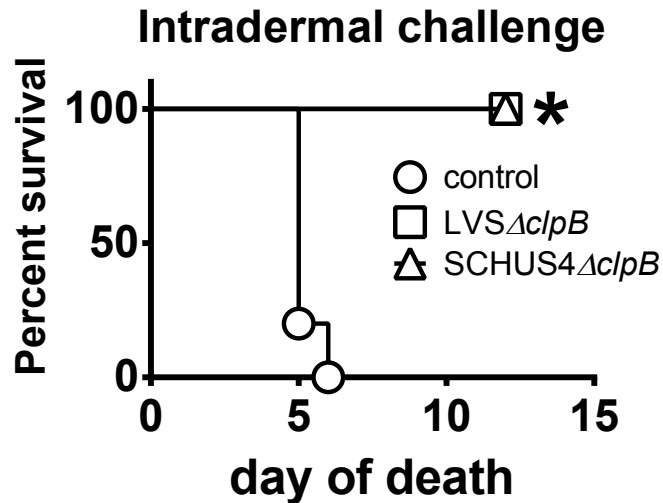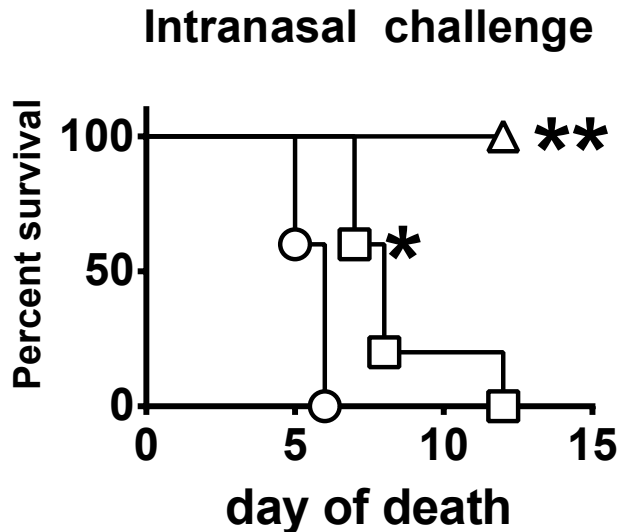

Table S1. Growth of attenuated strains of *F. tularensis* in SCID mice

| Bacteria            | Log <sub>10</sub> CFU /organ ± SD |             |              |              |            |
|---------------------|-----------------------------------|-------------|--------------|--------------|------------|
|                     | Lung                              | Liver       | Skin         | spleen       | Blood      |
| SCHUS4Δ <i>clpB</i> | 5.63 ±0.54                        | 6.77 ±0.21* | 6.15 ±0.37   | 6.47 ±0.13   | 4.13 ±0.37 |
| FSC200Δ <i>clpB</i> | 6.41± 0.92*                       | 7.27 ±0.62* | 7.37± 1.16 * | 7.35± 0.36** | 5.52± 0.97 |
| LVS                 | 5.14± 0.57                        | 5.65± 0.51  | 5.35± 0.34   | 6.03± 0.41   | 4.42± 0.74 |

SCID mice (n=5 /group) were challenged ID with 10<sup>3</sup> CFU of one or other bacterial strain, and killed on day 8 of infection for bacteriology. \*, significantly greater burden than LVS, \*\*, significantly greater burden than SCHUS4Δ*clpB* or LVS

Table S2. Attenuation and immunogenicity profiles of selected SCHU S4 deletion mutants administered ID or IN to BALB/c mice.

| Strain            | ID<br>LD <sub>50</sub> | Protection against ID challenge <sup>1</sup> |            | Protection against aerosol challenge <sup>1</sup>                        |            |
|-------------------|------------------------|----------------------------------------------|------------|--------------------------------------------------------------------------|------------|
|                   |                        | Vaccine<br>Dose.                             | Protection | Vaccine<br>Dose.                                                         | Protection |
| <i>ΔwbtC</i>      | ~10 <sup>7</sup>       | 10 <sup>3</sup>                              | ++++       | 10 <sup>7</sup>                                                          | -          |
| <i>ΔpmrA</i>      | ~10 <sup>1</sup>       | 10 <sup>1</sup>                              | ++++       | ND                                                                       | ND         |
| <i>ΔrelA</i>      | <10 <sup>1</sup>       | ND                                           | ND         | ND                                                                       | ND         |
| <i>ΔfupA</i>      | ~10 <sup>4</sup>       | 10 <sup>3</sup>                              | ++++       | 10 <sup>3</sup>                                                          | +          |
| <i>ΔclpB</i>      | >10 <sup>7</sup>       | 10 <sup>3</sup> , 10 <sup>5</sup>            | ++++       | 10 <sup>3</sup> , 10 <sup>7</sup>                                        | +++        |
| <i>Δggt</i>       | <10 <sup>7</sup>       | 10 <sup>3</sup>                              | ++++       | 10 <sup>5</sup>                                                          | +++        |
| <i>ΔcapB</i>      | <10 <sup>1</sup>       | ND                                           | ND         | ND                                                                       | ND         |
| <i>ΔclpBΔpmrA</i> | >10 <sup>7</sup>       | ND                                           | ND         | 10 <sup>7</sup>                                                          | ++         |
| <i>ΔclpBΔrelA</i> | >10 <sup>7</sup>       | ND                                           | ND         | 10 <sup>7</sup>                                                          | -          |
| <i>ΔclpBΔcapB</i> | >10 <sup>7</sup>       | 10 <sup>7</sup>                              | ++++       | 10 <sup>7</sup>                                                          | ++         |
| <i>ΔclpBΔwbtC</i> | >10 <sup>7</sup>       | 10 <sup>7</sup>                              | ++++       | 10 <sup>7</sup>                                                          | -          |
| <i>ΔclpBΔggt</i>  | >10 <sup>7</sup>       | 10 <sup>3</sup>                              | +++        | 10 <sup>7</sup>                                                          | +          |
| <i>ΔclpBΔfupA</i> | >10 <sup>7</sup>       | 10 <sup>7</sup>                              | ++++       | 10 <sup>7</sup>                                                          | +          |
| LVS               | >10 <sup>7</sup>       | 10 <sup>3</sup> , 10 <sup>6</sup>            | ++++       | 10 <sup>3</sup> , 10 <sup>5</sup> ,<br>10 <sup>6</sup> , 10 <sup>7</sup> | +          |

Mice were challenged ≥ 4 weeks post-vaccination.

<sup>1</sup>, the ID challenge dose was 1,000 SCHUS4 and the aerosol dose~ 100 CFU. All naïve mice died within 6 days of ID or IN challenge.

- ++++ all vaccinated mice survived challenge for >21 days
- +++ at least 50% of vaccinated mice survived challenge for >21 days
- ++ ≤ 20% vaccinated mice survived challenge for >21 days
- + mice survived significantly longer than naïve mice, but all died in <21 days
- Mice did not survive significantly longer than naïve mice
- ND Not determined
